# Supplementary material for: The role of Mn in widening the potential window of solid solution derived electrodes for aqueous supercapacitors
Source: Royal Society of Chemistry journal article supplement (doi:10.1039/d4ta00979g), 2024-01-01
Supplement: d4ta00979g1.pdf [file d4ta00979g1.pdf]

## Supplementary information

### **The Role of Mn in Boosting Wide Potential Window on Solid Solution Derived Electrodes for Aqueous Supercapacitors**

*Ziying Shi,<sup>ab</sup> Enzo Liu,<sup>a</sup> Biao Chen,<sup>ab</sup> Junwei Sha,<sup>a</sup> Lihua Qian,<sup>c</sup> Zhijia Zhang,<sup>d</sup> Xiaopeng Han,<sup>ab</sup> Wenbin Hu,<sup>ab</sup> Chunnian He,<sup>ab</sup> Naiqin Zhao<sup>ab</sup> and Jianli Kang<sup>\*ab</sup>*

*a* School of Materials Science and Engineering, Tianjin University, Tianjin, 300350, P.R. China.

*b* National Industry-Education Platform of Energy Storage, Tianjin University, 135 Yaguan Road, Tianjin, 300350, P.R. China.

*c* School of Physics, Huazhong University of Science and Technology, Wuhan, 430074, P.R. China.

*d* School of Materials Science and Engineering, Tiangong University, Tianjin, 300387, P.R. China.

## 1. Calculation of capacitance

The volumetric specific capacitance from the GCD curves could calculate based on Equations (S1):

$$C_v = \frac{I \cdot \Delta t}{V \cdot \Delta U} \quad (\text{S1})$$

where  $C_v$  was the volumetric specific capacitance ( $\text{F cm}^{-3}$ ),  $k$  was the CV scan rate ( $\text{mV s}^{-1}$ ),  $V$  was the working volume of the electrode ( $\text{cm}^3$ ),  $\Delta U$  was the working potential window (V),  $I$  was the current (A), and  $\Delta t$  was the discharge time (s).

The volumetric specific capacitance of the SSC device from the GCD curves was calculated from Equation (S2):

$$F_v = \frac{I \cdot \Delta t}{V \cdot \Delta U} \quad (\text{S2})$$

where  $F_v$  was the volumetric specific capacitance of the device ( $\text{F cm}^{-3}$ ),  $I$  was the current (A),  $V$  was the volume of the device ( $\text{cm}^3$ ),  $\Delta U$  was the working voltage (V) and  $\Delta t$  was the discharge time (s). The volumetric energy density ( $E_v$ ,  $\text{mWh cm}^{-3}$ ) and volumetric power density ( $P_v$ ,  $\text{mW cm}^{-3}$ ) were calculated by the following Equations (S3) and (S4):

$$E_v = \frac{F_v \cdot \Delta U^2}{2 \times 3600} \quad (\text{S3})$$

$$P_v = \frac{3600 \cdot E_v}{\Delta t} \quad (\text{S4})$$

## 2. Supporting Figures

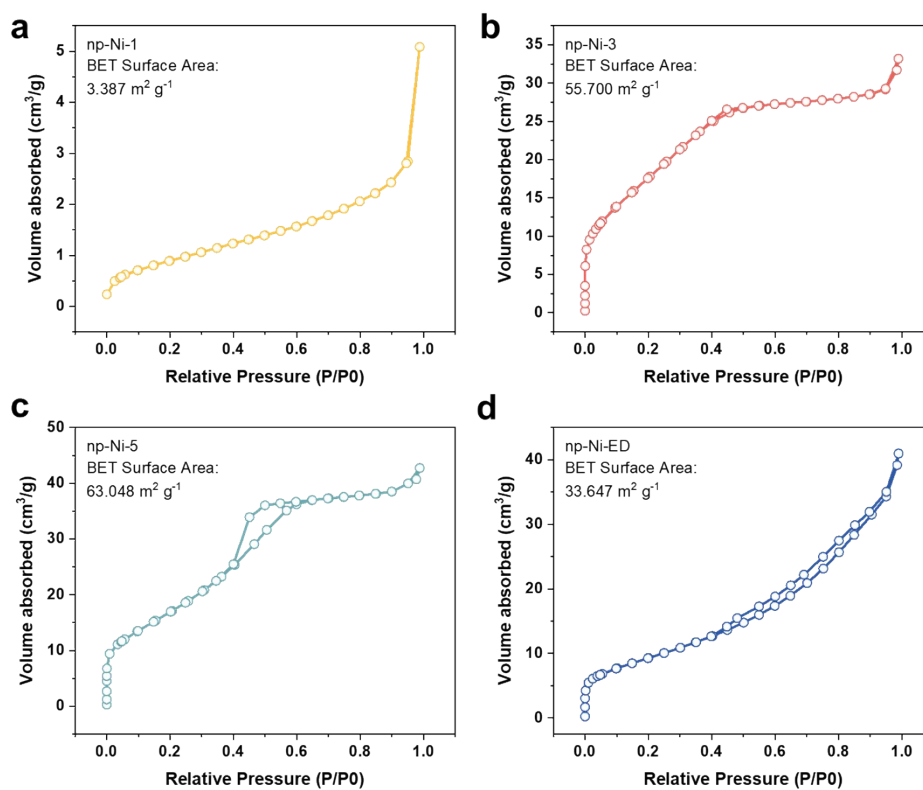

**Figure S1.** Nitrogen adsorption-desorption isotherm results of (a-c) np-Ni-X (X=1, 3, 5) and (d) np-Ni-ED.

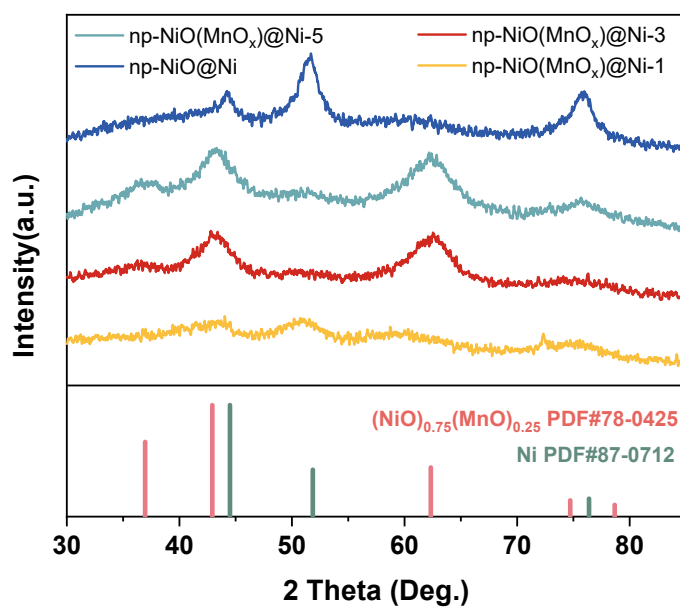

**Figure S2.** XRD patterns of np-NiO( $\text{MnO}_x$ )@Ni-X (X=1, 3, and 5) and np-NiO@Ni.

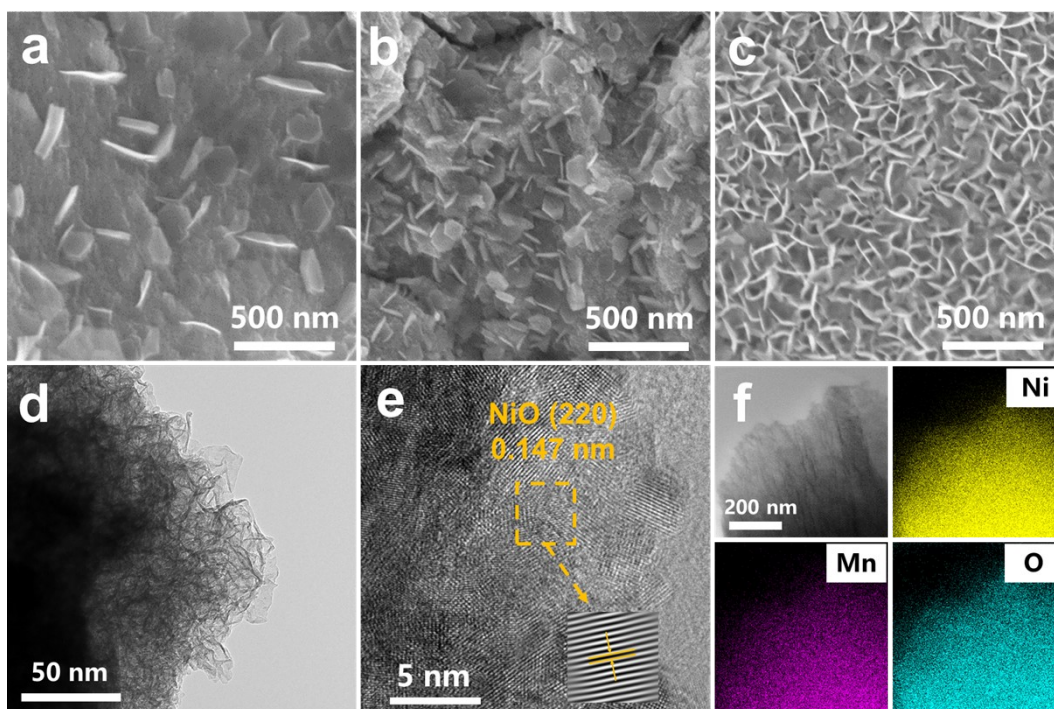

**Figure S3.** (a-b) The structure of np-Ni-5 after polarization treatment; (c) The SEM image of np-NiO(MnO<sub>x</sub>)@Ni-5; (d) TEM image of np-NiO(MnO<sub>x</sub>)@Ni-5 (f) HRTEM image of np-NiO(MnO<sub>x</sub>)@Ni-5. (f) The EDS element mapping images of np-NiO(MnO<sub>x</sub>)@Ni-5 for a selected region.

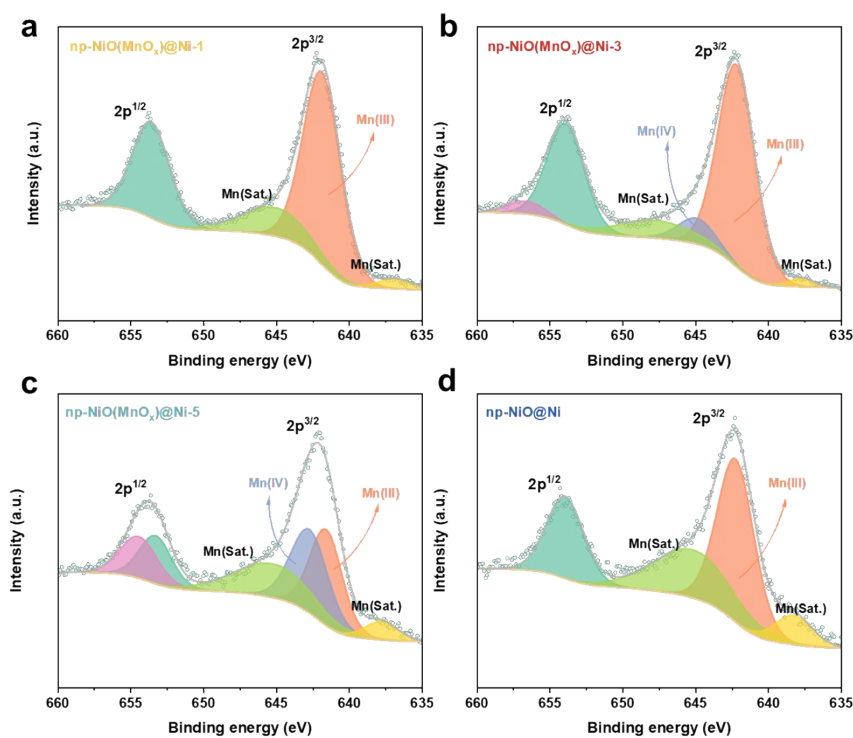

**Figure S4.** XPS high-resolution spectra of Mn 2p in (a) np-NiO(MnO<sub>x</sub>)@Ni-1, (b) np-NiO(MnO<sub>x</sub>)@Ni-3, (c) np-NiO(MnO<sub>x</sub>)@Ni-5 and (d) np-NiO@Ni.

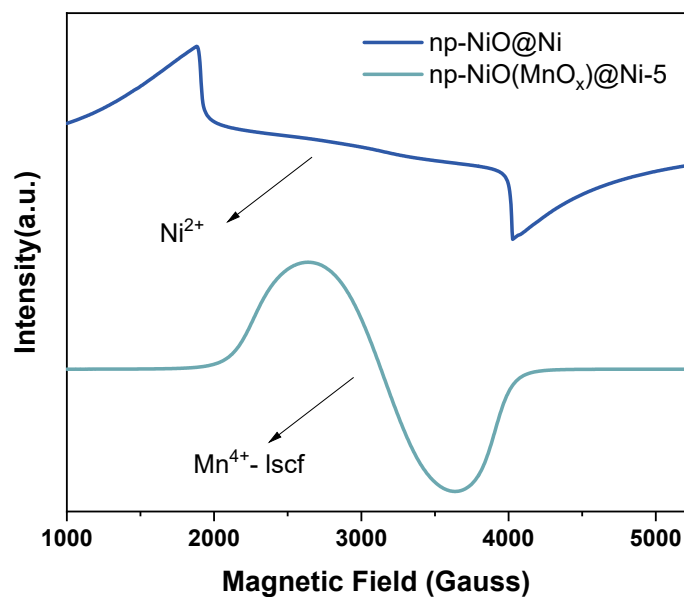

**Figure S5.** The ESR spectra for np-NiO(MnO<sub>x</sub>)@Ni-5 and np-NiO@Ni electrodes.

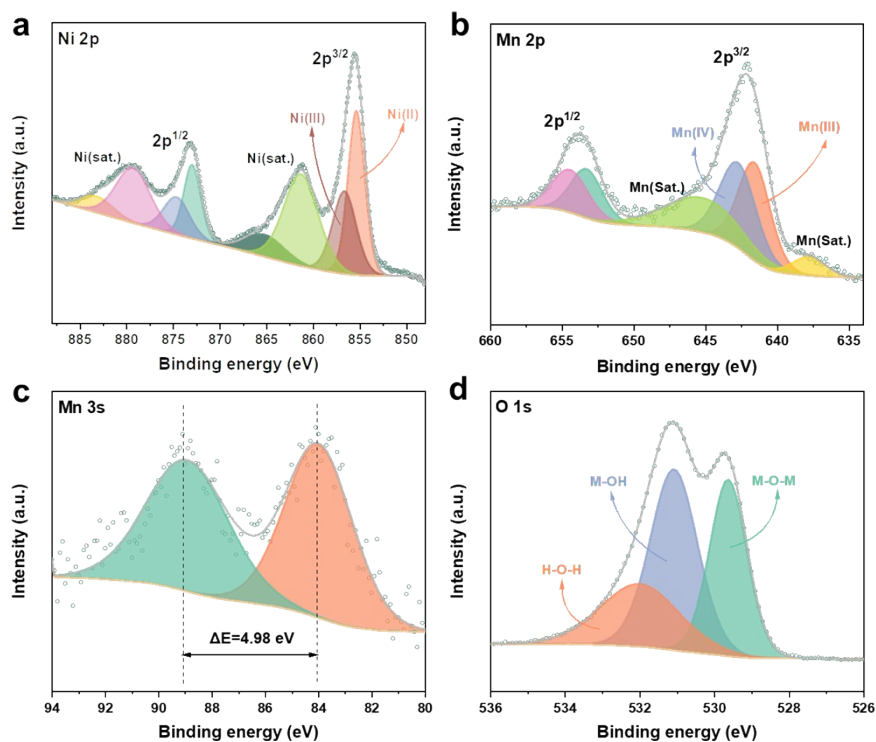

**Figure S6.** XPS high-resolution spectra of (a) Ni 2p, (b) Mn 2p, (c) Mn 3s and (d) O 1s of np-NiO(MnO<sub>x</sub>)@Ni-5.

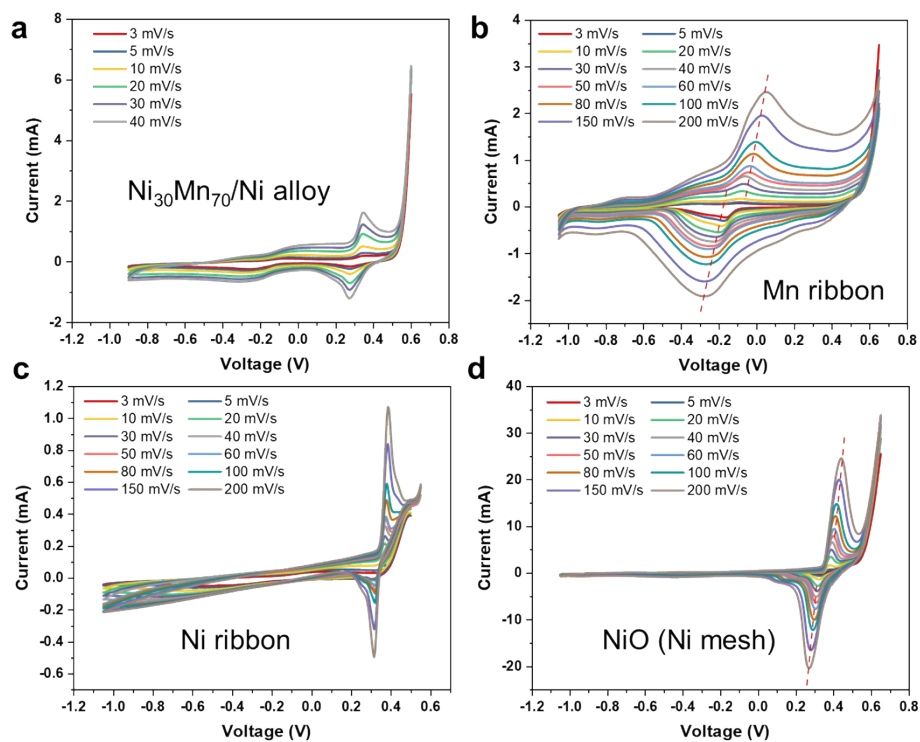

**Figure S7.** CV curves of pure Ni and Pure Mn potential: (a) Ni<sub>30</sub>Mn<sub>70</sub> alloy; (b) pure Mn ribbon; (c) pure Ni ribbon; (d) commercial Ni net (oxidized at 200°C for 3 h).

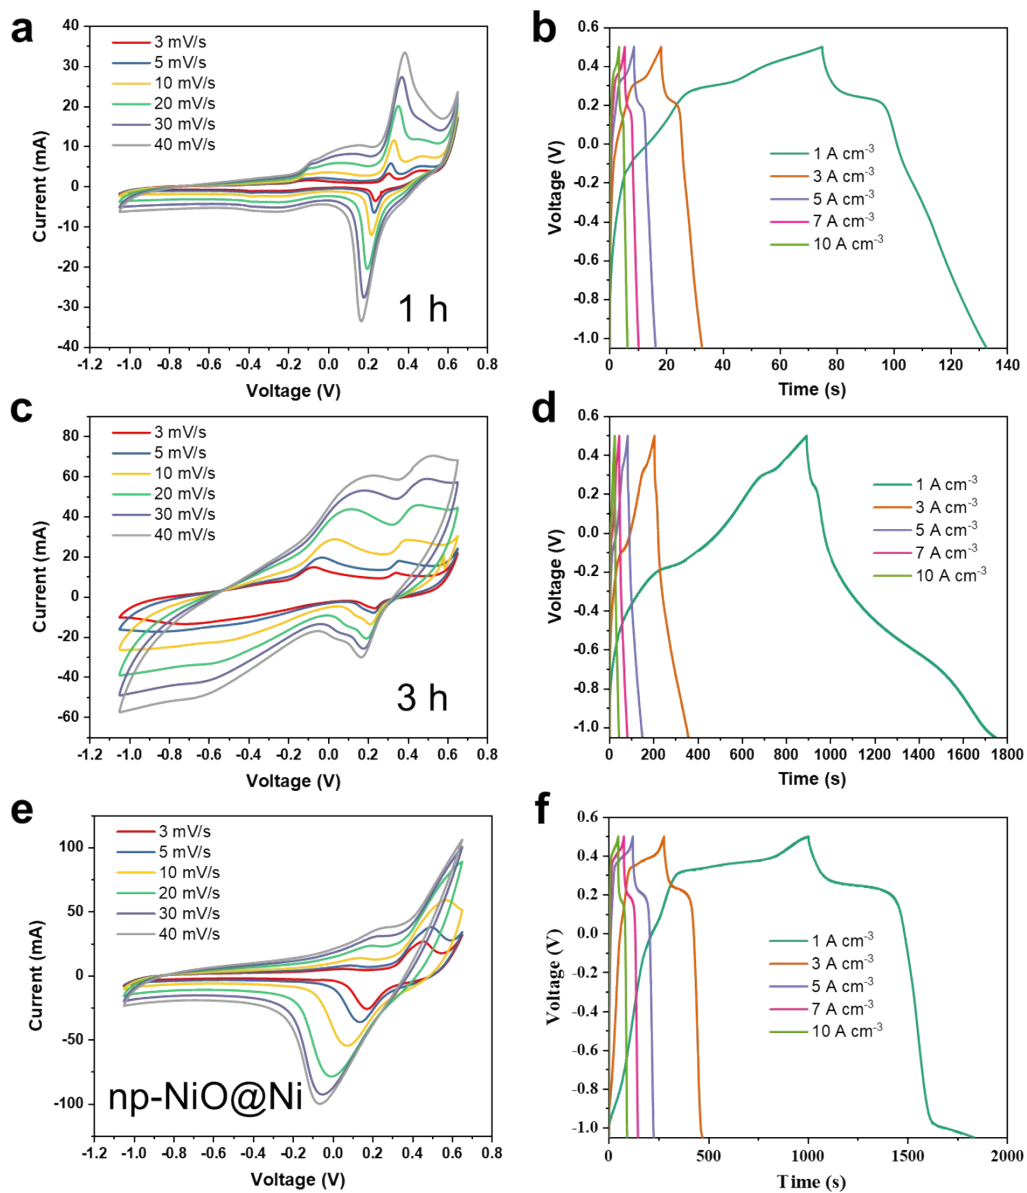

**Figure S8.** CV curves and GCD curves for (a-b)  $\text{np-NiO}(\text{MnO}_x)\text{@Ni-1}$ , (c-d)  $\text{np-NiO}(\text{MnO}_x)\text{@Ni-3}$  and (e-f)  $\text{np-NiO@Ni}$ .

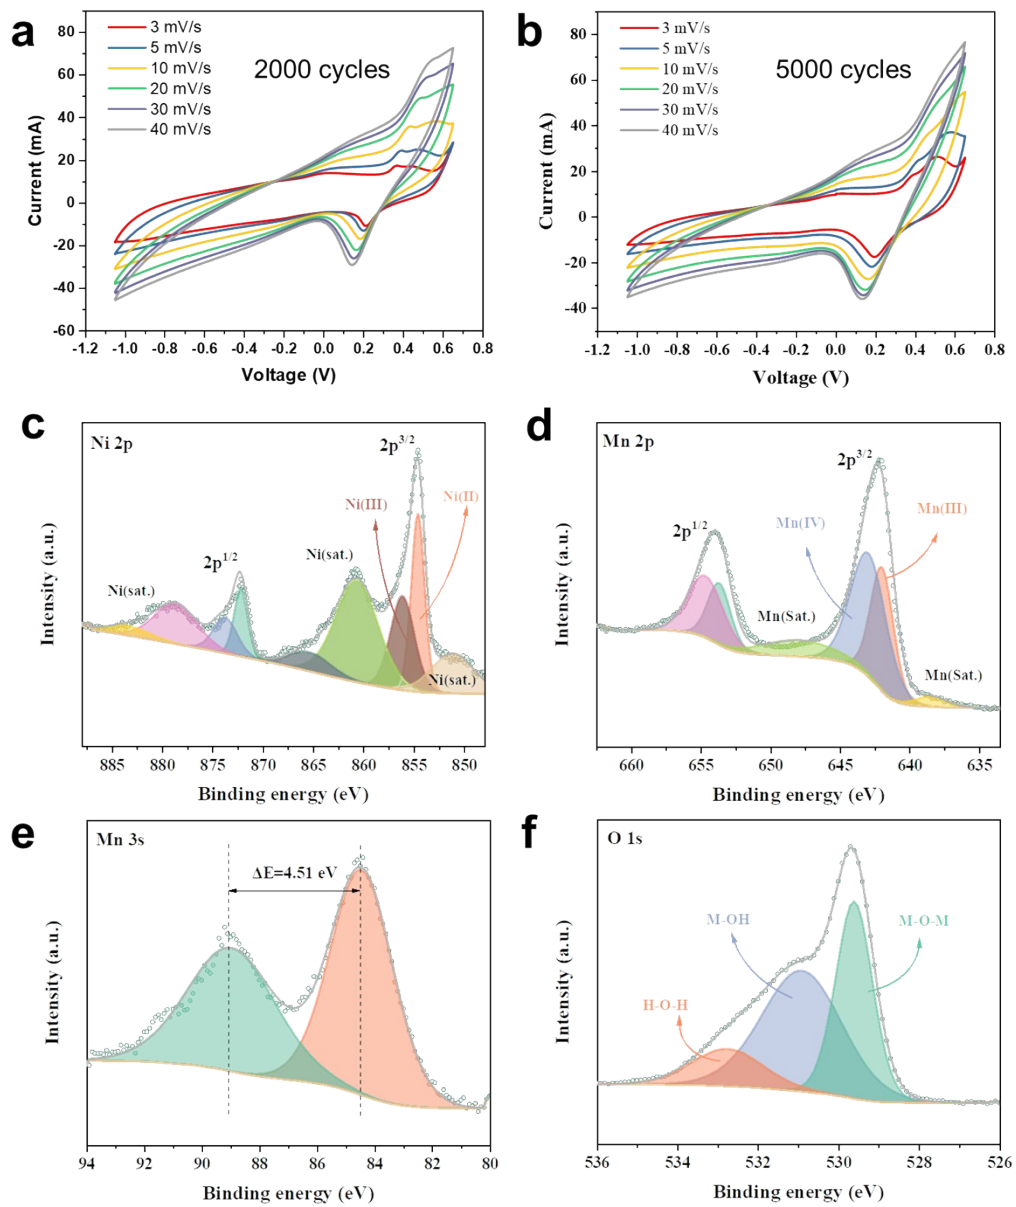

**Figure S9.** CV curves for (a) 2000 cycles and (b) 5000 cycles; XPS spectra for (c) Mn 2p, (d) Mn 3s, (e) Ni 2p, (f) O 1 s.



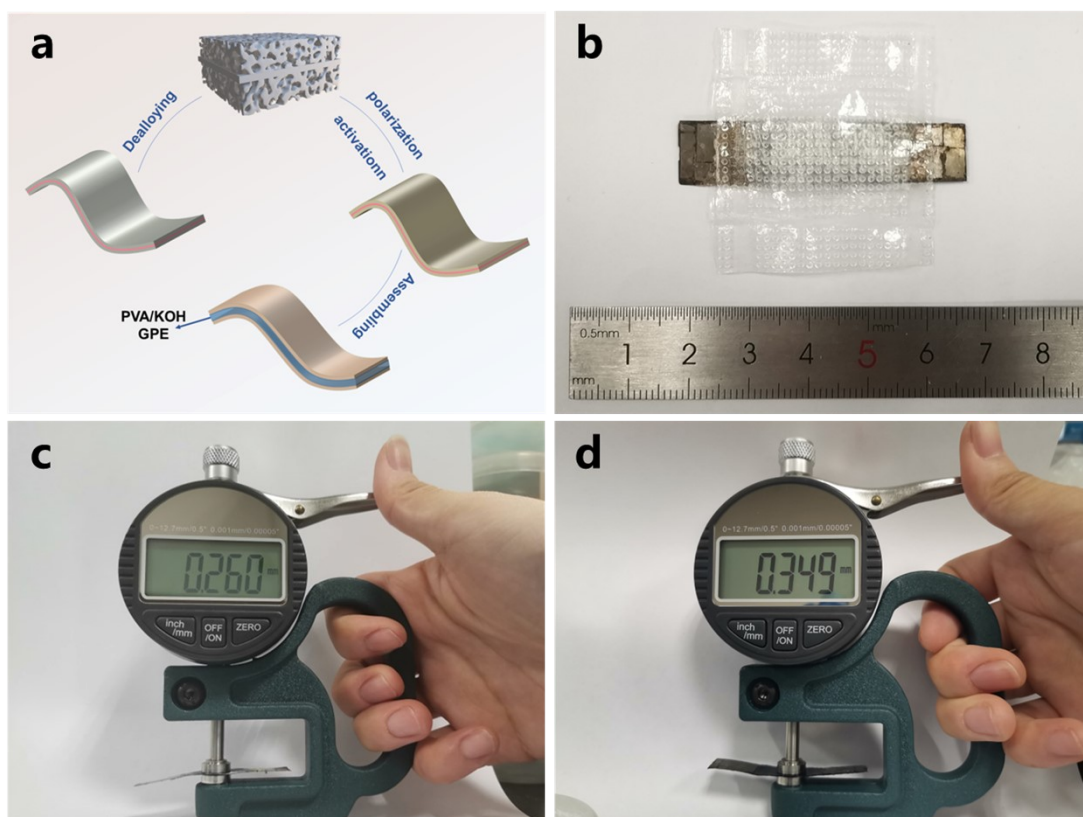

**Figure S10.** (a) A schematic diagram of assembling a quasi-solid-state supercapacitor; (b) digital photograph of a single SSC device; thicknesses of the quasi-solid-state supercapacitors: (c) a single SSC device and (d) a laminated SSC device.

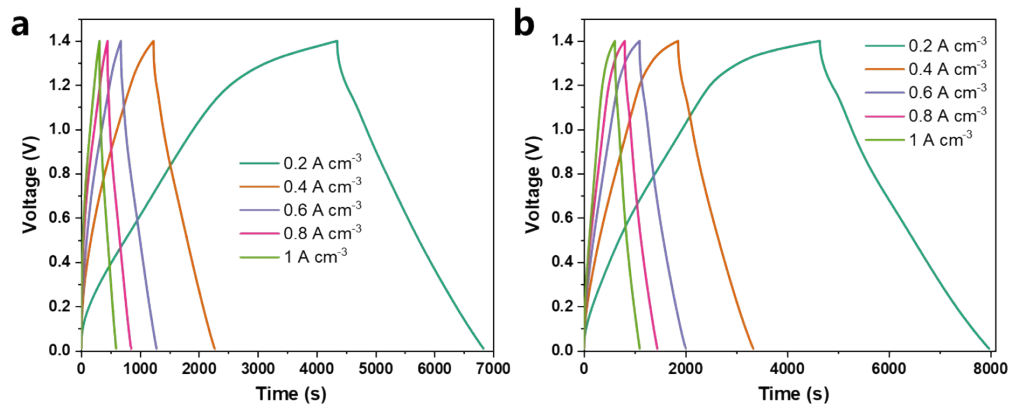

**Figure S11.** (a) GCD curves of a single SSC device; (b) GCD curves of a laminated SSC device.

### 3. Supporting Tables

**Table S1.** Residual content of manganese at different time of chemical dealloying.

| Element (at.%) | 1 h    | 2 h    | 3 h    | 4 h    | 5 h    | Electrochemical dealloying |
|----------------|--------|--------|--------|--------|--------|----------------------------|
| Mn             | 36.25  | 31.59  | 28.56  | 23.39  | 16.90  | 11.02                      |
| Ni             | 63.75  | 68.41  | 71.44  | 76.61  | 83.10  | 88.98                      |
| Total          | 100.00 | 100.00 | 100.00 | 100.00 | 100.00 | 100.00                     |

**Table S2.** Nitrogen adsorption-desorption isotherm results of np-Ni-X (X=1, 3, 5) and np-Ni-ED precursors.

| Samples                                                 | np-Ni-1 | np-Ni-3 | np-Ni-5 | np-Ni-ED |
|---------------------------------------------------------|---------|---------|---------|----------|
| Specific Surface Area (m <sup>2</sup> g <sup>-1</sup> ) | 3.387   | 55.700  | 63.047  | 33.647   |
| Pore Area (m <sup>2</sup> g <sup>-1</sup> )             | 1.952   | 40.575  | 43.573  | 22.946   |

**Table S3.** The relative Ni and Mn ratio on surface in np-Ni precursors and np-NiO(MnO<sub>x</sub>)@Ni electrodes through XPS analyses.

| Element (at.%) | np-Ni-5 | np-NiO(MnO <sub>x</sub> )@Ni-5 | np-Ni-ED | np-NiO@Ni |
|----------------|---------|--------------------------------|----------|-----------|
| Mn             | 28.96   | 74.09                          | 18.31    | 63.72     |
| Ni             | 71.04   | 25.91                          | 81.69    | 36.28     |
| Total          | 100.00  | 100.00                         | 100.00   | 100.00    |

**Table S4.** Comparison of self-discharge performance in this work and previously reported literatures.

| Electrodes                                                               | Electrolyte                                   | OCP decay                   | Voltage retention    | Ref.         |
|--------------------------------------------------------------------------|-----------------------------------------------|-----------------------------|----------------------|--------------|
| $\text{Li}_x\text{Nb}_2\text{O}_5//\text{Li}_{2-x}\text{Nb}_2\text{O}_5$ | 1 M $\text{LiPF}_6$                           | 1.00 V $\rightarrow$ 0.40 V | 40%<br>after ~0.8 h  | 1            |
| ZnO- $\text{Co}_3\text{O}_4$ SSC                                         | PVA- $\text{Na}_2\text{SO}_4$                 | 1.60 V $\rightarrow$ 0.36 V | 22.5%<br>after ~8 h  | 2            |
| CuO- $\text{Ni}_3\text{S}_2$ SSC                                         | PVA-KOH                                       | 1.50 V $\rightarrow$ 0.80 V | 56%<br>after ~2 h    | 3            |
| Cu-Ni//graphite                                                          | KOH                                           | 1.00 V $\rightarrow$ 0.55 V | 55%<br>after ~0.3 h  | 4            |
| $\text{Ti}_3\text{C}_2\text{T}_x$ Mxene SSC                              | 1 M KOH                                       | 0.80 V $\rightarrow$ 0.40 V | 50%<br>after ~16.7 h | 5            |
| $\text{Co}_3\text{O}_4@\text{Ni}_3\text{S}_4//\text{PC}$                 | 2 M KOH                                       | 1.50 V $\rightarrow$ 0.75 V | 50%<br>after ~5.3 h  | 6            |
| Carbon Cloth SSC                                                         | $\text{CuCl}_2$ -PVA- $\text{H}_2\text{SO}_4$ | 1.00 V $\rightarrow$ 0.50 V | 50%<br>after ~5.1 h  | 7            |
| np- $\text{NiO}(\text{MnO}_x)@\text{Ni-5}$ SSC                           | PVA-KOH                                       | 1.40 V $\rightarrow$ 0.70 V | 50%<br>after ~25 h   | this<br>work |

**Table S5.** Comparison of electrochemical performance of different electrode have been reported.

| Electrodes                                                                                               | Potential window | Specific capacitance                                   | Power density (Energy density)                              | Cycling stability                        | Ref.             |
|----------------------------------------------------------------------------------------------------------|------------------|--------------------------------------------------------|-------------------------------------------------------------|------------------------------------------|------------------|
| NiCo <sub>2</sub> O <sub>4</sub> //Fe foam                                                               | 1.7 V            | 26.6 F cm <sup>-3</sup><br>(2 mA cm <sup>-2</sup> )    | 14.17 mW cm <sup>-3</sup><br>(10.68 mWh cm <sup>-3</sup> )  | 5000<br>(10 mA cm <sup>-2</sup> , 97%)   | 8                |
| MnO <sub>2</sub> //S-MoO <sub>3-x</sub>                                                                  | 1.8 V            | 6.19 F cm <sup>-3</sup><br>(0.5 mA cm <sup>-1</sup> )  | 2.11 W cm <sup>-3</sup><br>(2.79 mWh cm <sup>-3</sup> )     | /                                        | 9                |
| ZnFe <sub>2</sub> O <sub>4</sub> -NCF//NiCo <sub>2</sub> O <sub>4</sub> -NCF                             | 1.2 V            | 1.97 F cm <sup>-3</sup><br>(0.5 A g <sup>-1</sup> )    | 10 mW cm <sup>-3</sup><br>(0.39 mWh cm <sup>-3</sup> )      | 20000<br>(/, 74.5%)                      | 10               |
| Nb-CMO <sub>4</sub> -C <sub>x</sub> S <sub>y</sub> NC//rGO/Ti <sub>3</sub> C <sub>2</sub> T <sub>x</sub> | 1.5 V            | 241.7 F g <sup>-1</sup><br>(2.5 A g <sup>-1</sup> )    | 39.6 mW cm <sup>-3</sup><br>(1.58 mWh cm <sup>-3</sup> )    | 10000<br>(40 A g <sup>-1</sup> , 96.2%)  | 11               |
| Ni-Co oxyhydroxides//AC                                                                                  | 1.8 V            | 5.7 F cm <sup>-2</sup><br>(30 mA cm <sup>-2</sup> )    | 204.1 mW cm <sup>-3</sup><br>(19.5 mWh cm <sup>-3</sup> )   | 7000<br>(200 mA cm <sup>-2</sup> , 91%)  | 12               |
| Ni(OH) <sub>2</sub> nanowire//carbon fiber                                                               | 1.5 V            | 35.67 F cm <sup>-2</sup><br>(0.1 mA)                   | 1.6 W cm <sup>-3</sup><br>(2.16 mWh cm <sup>-3</sup> )      | 10000<br>(10 A cm <sup>-3</sup> , 70%)   | 13               |
| Ni/MnO <sub>2</sub> -FP//Ni/AC-FP                                                                        | 2.5 V            | 1.4 F cm <sup>-3</sup><br>(2.5 mA cm <sup>-3</sup> )   | 2.5 mW cm <sup>-3</sup><br>(0.78 mWh cm <sup>-3</sup> )     | 1000<br>(20 mA cm <sup>-2</sup> , 85.1%) | 14               |
| MnO <sub>2</sub> /PEDOT-PSS//OMC                                                                         | 1.8 V            | 23.4 F cm <sup>-3</sup><br>(0.085 A cm <sup>-3</sup> ) | 0.03 W cm <sup>-3</sup><br>(11.3 mWh cm <sup>-3</sup> )     | 1000<br>(20 mA cm <sup>-2</sup> , 85.1%) | 15               |
| Cu-CuO@CoFe-LDH//Cu-AC                                                                                   | 1.2 V            | 9.38 F cm <sup>-3</sup><br>(0.25 A cm <sup>-3</sup> )  | 914.5 mW cm <sup>-3</sup><br>(1.857 mWh cm <sup>-3</sup> )  | 2000<br>(0.5 A cm <sup>-3</sup> , 99.5%) | 16               |
| Ni-doped MnO <sub>2</sub> @CC SSC                                                                        | 1.2 V            | 71.54 mF cm <sup>-2</sup><br>(2 mA cm <sup>-3</sup> )  | 31.43 mW cm <sup>-3</sup><br>(0.6871 mWh cm <sup>-3</sup> ) | /                                        | 17               |
| np-NiO(MnO <sub>x</sub> )@Ni-5 SSC                                                                       | 1.5 V            | 138.36 F cm <sup>-3</sup><br>(0.2 A cm <sup>-3</sup> ) | 3253.68 mW cm <sup>-3</sup><br>(8.07 mWh cm <sup>-3</sup> ) | 5000<br>(10 A cm <sup>-3</sup> , 91%)    | <b>this work</b> |

## References

1. X. Yan, S. Jing, T. Li, Y. Xiong, T. Hu, Z. Wang and X. Ge, *Chemical Engineering Journal*, 2022, **450**.
2. R. K. Mishra, G. J. Choi, H. J. Choi, J. Singh, F. S. Mirsafi, H.-G. Rubahn, Y. K. Mishra, S. H. Lee and J. S. Gwag, *Chemical Engineering Journal*, 2022, **427**.
3. D. Mishra, S. Kim, N. Kumar, M. Krishnaiah and S. H. Jin, *Journal of Materials Science & Technology*, 2023, **147**, 77-90.
4. A. Yavuz, M. Artan and N. F. Yilmaz, *Journal of Physics and Chemistry of Solids*, 2022, **169**.
5. S. Pu, Z. Wang, Y. Xie, J. Fan, Z. Xu, Y. Wang, H. He, X. Zhang, W. Yang and H. Zhang, *Advanced Functional Materials*, 2022, **33**.
6. J. Chang, S. Zang, Y. Wang, C. Chen, D. Wu, F. Xu, K. Jiang, Z. Bai and Z. Gao, *Electrochimica Acta*, 2020, **353**.
7. H. Wang, J. Chen, R. Fan and Y. Wang, *Sustainable Energy & Fuels*, 2018, **2**, 2727-2732.
8. C. Zhang, L. Hou, W. Yang, S. Du, B. Jiang, H. Bai, Z. Li, C. Wang, F. Yang and Y. Li, *Chemical Engineering Journal*, 2023, **467**.
9. S. Liu, C. Xu, H. Yang, G. Qian, S. Hua, J. Liu, X. Zheng and X. Lu, *Small*, 2020, **16**.
10. B. H. Xiao, R. T. Lin, K. Xiao and Z. Q. Liu, *Journal of Power Sources*, 2022, **530**.
11. A. M. Patil, S. Moon, Y. Seo, S. B. Roy, A. A. Jadhav, D. P. Dubal, K. Kang and S. C. Jun, *Small*, 2023, **19**, e2205491.
12. X. Ren, M. Li, L. Qiu, X. Guo, F. Tian, G. Han, W. Yang and Y. Yu, *Journal of Materials Chemistry A*, 2023, **11**, 5754-5765.
13. X. Dong, Z. Guo, Y. Song, M. Hou, J. Wang, Y. Wang and Y. Xia, *Advanced Functional Materials*, 2014, **24**, 3405-3412.
14. L. Zhang, P. Zhu, F. Zhou, W. Zeng, H. Su, G. Li, J. Gao, R. Sun and C.-p. Wong, *ACS Nano*, 2015, **10**, 1273-1282.
15. X. Cheng, J. Zhang, J. Ren, N. Liu, P. Chen, Y. Zhang, J. Deng, Y. Wang and H. Peng, *The Journal of Physical Chemistry C*, 2016, **120**, 9685-9691.
16. Z. Li, M. Shao, L. Zhou, R. Zhang, C. Zhang, J. Han, M. Wei, D. G. Evans and X. Duan, *Nano Energy*, 2016, **20**, 294-304.
17. R. Zhong, M. Xu, N. Fu, R. Liu, A. a. Zhou, X. Wang and Z. Yang, *Electrochimica Acta*, 2020, **348**.
